# Supplementary material for: Exploratory phosphoproteomics profiling of Aedes aegypti Malpighian tubules during blood meal processing reveals dramatic transition in function
Source: PLoS One. 2022 Jul 8;17(7):e0271248. doi: 10.1371/journal.pone.0271248 (PMC9269769; doi:10.1371/journal.pone.0271248)
Supplement: S2 File — Descriptions of protein function were compiled from UniProt [80] and/or the GeneCards Human Gene Database (https://www.genecards.org) [81]. (XLSX) [file pone.0271248.s002.xlsx]

## Sheet: Sheet1
Abbreviation	Full Name	Function
SRP72	Signal Recognition Particle 72	Recognition of signal peptide for co-translation
Sec61β	Sec61 Translocon Subunit Beta	Subunit of translocon in the ER
TRAM1	Translocation Associated Membrane Protein 1	Assist with insertion of transmembrane proteins
Sec16A	Sec16 Homolog A	Scaffold protein organizing ER exit sites (ERESs)
Sec31A	Sec31 Homolog A	Component of coat protein complex II (COPII) outer layer
Tango1	Transport and Golgi Organization Protein 1	Localizes to ERES and facilitates loading of large cargo molecules into COPII vesicles
TRAPPC10	Trafficking Protein Particle Complex Subunit 10	Golgi tethering complex subunit that functions in vesicle transport
TRAPPC11	Trafficking Protein Particle Complex Subunit 11	Golgi tethering complex subunit that functions in vesicle transport
Rab1A	Ras-related Protein Rab1A	Ras GTPase regulating vesicle traffic from ER to Golgi apparatus
Napg	NSF Attachment Protein Gamma	Facilitates vesicle traffic between ER and Golgi apparatus
GolgA2	Golgin A2	Assists in tethering of vesicles at the Golgi Apparatus
Gbf1	Golgi Brefeldin A Resistant Guanine Nucleotide Exchange Factor 1	GEF that assists in recruitment of COPI coat proteins to cis-Golgi for retrograde transport to ER
Use1	Unconventional SNARE in the ER 1	SNARE protein predicted to function in Golgi-ER retrograde transport
Sec20	Vesicle Transport Protein Sec20	Component of ER SNARE complex regulating membrane fusion events at the ER
Arfgef1	ADP Ribosylation Factor Guanine Nucleotide Exchange Factor 1	Golgi protein involved in vesicle transport
Dynamin	Dynamin	GTPase responsible for pinching off of clathrin-coated vesicle membranes
Eps15	Epidermal Growth Factor Receptor Pathway Substrate 15	Aids in formation of clathrin-coated pits and clathrin adaptor for post-Golgi trafficking
GolgA4L	Golgin A4-like	Involved in vesicle trafficking at the Golgi
Vps13B	Vacuolar Protein Sorting-Associated Protein 13B	Possibly involved in sorting of post-Golgi vesicle traffic
Vps45	Vacuolar Protein Sorting 45 Homolog	Possibly involved in vesicle-mediated trafficking from Golgi stack through trans-Golgi
Ptpn9	Protein Tyrosine Phosphatase Non-Receptor Type 9	Protein localized in vesicles possibly involved in membrane fusion
Gak	Cyclin G Associated Kinase	Possibly involved in uncoating of clathrin-coated vesicles
Gga2	Golgi Associated, Gama Adaptin Ear Containing, ARF Binding Protein 2	Golgi-localized protein involved in vesicle trafficking of proteins between the trans-Golgi and lysosome/endosome compartments
Exoc4	Exocyst Complex Component 4	Component of exocyst complex, which targets vesicles to specific sites at the cell membrane
Stxb5	Syntaxin Binding Protein 5	Component of SNARE complex regulating vesicle fusion at the cell membrane
Syb	Synaptobrevin	Vesicle-associated SNARE involved in vesicle fusion at the cell membrane
Itsn1	Intersectin 1	Cell membrane protein involved in clathrin-coated vesicle formation and linking endocytic membrane traffic to the actin cytoskeleton
Amph	Amphiphysin	Protein with possible role in regulation of clathrin-coated vesicle formation
Epsin-1	Epsin-1	Facilitates formation of clathrin coated vesicles
EndoA	Endophilin-A	Protein with possible role in vesicle endocytosis
Fcho2	FCH and Mu Domain Containing Endocytic Adaptor 2	Facilitates formation of clathrin coated vesicles
Rab11B	Ras-related Protein Rab11B	Ras GTPase involved in endocytic recycling and post-Golgi vesicle transport
Rab11FIP5	Rab11 Family Interacting Protein 5	Effector protein regulating vesicle trafficking from recycling endosomes to cell membrane
Vps16	Vps16 Core Subunit of CORVET and HOPS Complexes	Involved in sorting of endosomal contents to lysosomes
Vps33A	Vps33A Core Subunit of CORVET and HOPS Complexes	Involved in sorting of endosomal contents to lysosomes
Vps37B	Vps37B Subunit of ESCRT-1	Involved in sorting of endosomal contents to multivesicular bodies
Vps53	Vps53 Subunit of GARP Complex	Involved in sorting of endosomal contents to trans-Golgi
Chmp2a	Charged Multivesicular Body Protein 2a	Involved in sorting of endosomal contents to multivesicular bodies
Vps26B	Vps26 Retromer Complex Component B	Involved in sorting of endosomal contents to trans-Golgi
Sorl1	Sortilin Related Receptor 1	Involved in endosomal protein sorting
Rbsn	Rabenosyn, RAB Effector	Involved in vesicle trafficking from the endosome
Hgs	Hepatocyte Growth Factor-Regulated Tyrosine Kinase Substrate	Involved in endosomal protein sorting
Kinesin HC	Kinesin Heavy Chain	Motor protein mediating cargo transport along the microtubule cytoskeleton
Kif13A	Kinesin Family Member 13A	Motor protein mediating cargo transport along the microtubule cytoskeleton
Dctn4-p62	Dynactin Subunit 4	Possibly involved in linking dynein to microtubule cytoskeleton
Dctn1	Dynactin Subunit 1	Interacts with dynein and microtubules to mediate cargo transport along the microtubule cytoskeleton
TSC1	Tuberous Sclerosis Complex 1	Inhibitor of mTOR complex 1 nutrient signaling
TSC2	Tuberous Sclerosis Complex 2	Inhibitor of mTOR complex 1 nutrient signaling
Sestrin	Sestrin	Intracellular nutrient sensor that negatively regulates mTOR complex 1 signaling
GATOR2	GATOR Complex protein WDR24	Positive regulator of mTOR complex 1 nutrient signaling
S6K	Ribosomal Protein S6 Kinase	Kinase effector of mTOR signaling that phosphorylates Ribosomal Protein S6 to promote protein synthesis
S6	Ribosomal Protein S6	Ribosomal protein, substrate of S6K and promotes protein synthesis and cell growth when phosphorylated
4.1h	Protein 4.1 Homolog	Anchor protein linking transmembrane proteins to cytoskeleton
Afadin	Afadin	Anchor protein linking actin cytoskeleton to cell junction proteins
Dlh	Discs Large	Scaffold protein involved in assembly of cell-cell junctions
Lap4	Protein Lap4	Scaffold protein involved in assembly of cell-cell junctions
Lgl	Lethal Giant Larvae Homolog	Protein involved in assembly of cell-cell junctions
Par3h	Par3 Homolog	Protein involved in assembly of cell-cell junctions
PKC	Protein Kinase C	Kinase involved in many cellular processes including regulation of cell-junction proteins
Fasciclin1	Fasciclin1	Cell adhesion molecule
Fasciclin2	Fasciclin2	Cell adhesion molecule
Na/K ATPase α	Sodium/Potassium Transporting ATPase Subunit Alpha	Catalytic component of sodium/potassium ATPase pump
Na/K ATPase β	Sodium/Potassium Transporting ATPase Subunit Beta	Regulatory subunit of sodium/potassium ATPase pump
Crumbs	Crumbs	Transmembrane protein involved in forming cell junctions and defining apical polarity
Actin-5C	Actin-5C	Actin isoform, assembles to form actin cytoskeleton
Adducin	Adducin	Protein involved in formation of actin-spectrin network
Annexin	Annexin	Protein involved in organization of the actin cytoskeleton at the cell membrane
Spectrin α	Spectrin α	Scaffold protein linking the cell membrane to the actin cytoskeleton. Also controls cell shape and arragnement of transmembrane proteins
Spectrin β	Spectrin β	Scaffold protein linking the cell membrane to the actin cytoskeleton. Also controls cell shape and arragnement of transmembrane proteins
